# Supplementary material
Source: PubMed Central journal article supplement (PMC2596804)

## Supporting Information for

# Azamerone, A Novel Terpenoid Phthalazinone from a Marine-Derived Bacterium related to the Genus *Streptomyces* (Actinomycetales)

Ji Young Cho, Hak Cheol Kwon, Philip G Williams, Christopher A. Kauffman,

Paul R. Jensen, William Fenical\*

*Center for Marine Biotechnology and Biomedicine, Scripps Institution of Oceanography,*

*University of California-San Diego, La Jolla, California 92093-0204*

## Table of Contents

---

|                                                                                                                   |     |
|-------------------------------------------------------------------------------------------------------------------|-----|
| <b>Table S1.</b> Spectral Data for Azamerone ( <b>1</b> ) at 500 MHz in CD <sub>3</sub> OD .....                  | S3  |
| <b>Figure S1.</b> <sup>1</sup> H NMR Spectrum (500 MHz) of Azamerone ( <b>1</b> ) in CD <sub>3</sub> OD .....     | S5  |
| <b>Figure S2.</b> <sup>13</sup> C NMR Spectrum (125 MHz) of Azamerone ( <b>1</b> ) in CD <sub>3</sub> OD .....    | S6  |
| <b>Figure S3.</b> gHMBC NMR Spectrum (500 MHz) of Azamerone ( <b>1</b> ) in CD <sub>3</sub> OD .....              | S7  |
| <b>Figure S4.</b> gCOSY NMR Spectrum (500 MHz) of Azamerone ( <b>1</b> ) in CD <sub>3</sub> OD .....              | S8  |
| <b>Figure S5.</b> gHMBC NMR Spectrum (500 MHz) of Azamerone ( <b>1</b> ) in CD <sub>3</sub> OD .....              | S9  |
| <b>Figure S6.</b> Expansion of gHMBC NMR Spectrum (500 MHz) of Azamerone ( <b>1</b> ) in CD <sub>3</sub> OD ..... | S10 |
| <b>Figure S7.</b> Expansion of gHMBC NMR Spectrum (500 MHz) of Azamerone ( <b>1</b> ) in CD <sub>3</sub> OD ..... | S11 |
| <b>Figure S8.</b> Crystal Structure .....                                                                         | S12 |
| <b>Figure S9.</b> UV spectra of Azamerone ( <b>1</b> ) in CH <sub>3</sub> OH .....                                | S13 |
| <b>Figure S10.</b> HR-ESI-TOFMS of Azamerone ( <b>1</b> ) in CH <sub>3</sub> OH .....                             | S14 |

**Table S1.** Spectral Data for Azamerone (**1**) at 500 MHz in CD<sub>3</sub>OD

| C/H # | $\delta$ H mult (J/Hz) | $\delta$ C |                 | COSY        | HMBC                     | 1D NOE              |
|-------|------------------------|------------|-----------------|-------------|--------------------------|---------------------|
| 3     | 9.76 s                 | 152.2      | CH              |             | C4, C5, C13              | 1a', 2'             |
| 4     |                        | 146.5      |                 |             |                          |                     |
| 5     |                        | 71.6       |                 |             |                          |                     |
| 6     |                        | 172.8      |                 |             |                          |                     |
| 8     |                        | 82.7       |                 |             |                          |                     |
| 9     | 4.33 dd (7.5, 5.5)     | 59.3       | CH              | 10          | C8, C10, C11, C17, C18   | 10, 17, 18          |
| 10a   | 2.61 dd (17.5, 7.5)    | 27.7       | CH <sub>2</sub> | 9, 10b      | C6, C8, C9, C11, C12     |                     |
| 10b   | 3.09 dd (17.5, 5.5)    |            |                 | 9, 10a      | C6, C8, C9, C11, C12     |                     |
| 11    |                        | 110.0      |                 |             |                          |                     |
| 12    |                        | 181.6      |                 |             |                          |                     |
| 13    |                        | 124.8      |                 |             |                          |                     |
| 14    |                        | 158.8      |                 |             |                          |                     |
| 15    |                        | 202.5      |                 |             |                          |                     |
| 16    | 2.60 s                 | 30.0       | CH <sub>3</sub> |             | C14, C15                 |                     |
| 17    | 1.48 s                 | 21.9       | CH <sub>3</sub> |             | C8, C9                   | 9, 10a, 18          |
| 18    | 1.60 s                 | 26.1       | CH <sub>3</sub> |             | C8                       | 9, 17               |
| 1a'   | 2.63 dd (15.0, 7.0)    | 41.9       | CH <sub>2</sub> | 1b', 2'     | C2', C4, C6              |                     |
| 1b'   | 1.95 dd (15.0, 2.0)    |            |                 | 1a', 2'     | C2', C4, C6              |                     |
| 2'    | 1.70 dd (7.0, 2.0)     | 51.3       | CH              | 1'          | C6', C7', C8', C9', C10' |                     |
| 3'    |                        | 72.4       |                 |             |                          |                     |
| 4a'   | 1.81 td (14.0, 3.5)    | 42.6       | CH <sub>2</sub> | 4b', 5'     | C3', C'5', C10'          |                     |
| 4b'   | 1.65 dt (14.0, 3.5)    |            |                 | 4a', 5'     | C3', C'5', C10'          |                     |
| 5a'   | 1.99 m                 | 31.9       | CH <sub>2</sub> | 4', 5b', 6' | C4', C6'                 |                     |
| 5b'   | 1.85 m                 |            |                 | 4', 5a', 6' | C4', C6'                 |                     |
| 6'    | 3.79 dd (12.0, 4.0)    | 71.4       | CH              | 5'          | C4', C5', C7, C8', C9'   | 2', 4b', 5a', 9'    |
| 7'    |                        | 41.6       |                 |             |                          |                     |
| 8'    | 0.78 s                 | 16.4       | CH <sub>3</sub> |             | C2', C6', C7', C9'       | 1', 5b', 9', 10'    |
| 9'    | 0.50 s                 | 29.2       | CH <sub>3</sub> |             | C2', C6', C7', C8'       | 1b', 2', 6', 8', 9' |
| 10'   | 1.22 s                 | 23.8       | CH <sub>3</sub> |             | C2', C3', C4'            | 1a', 4a', 8'        |

**Figure S1.**  $^1\text{H}$  NMR Spectrum (500 MHz) of Azamerone (**1**) in  $\text{CD}_3\text{OD}$

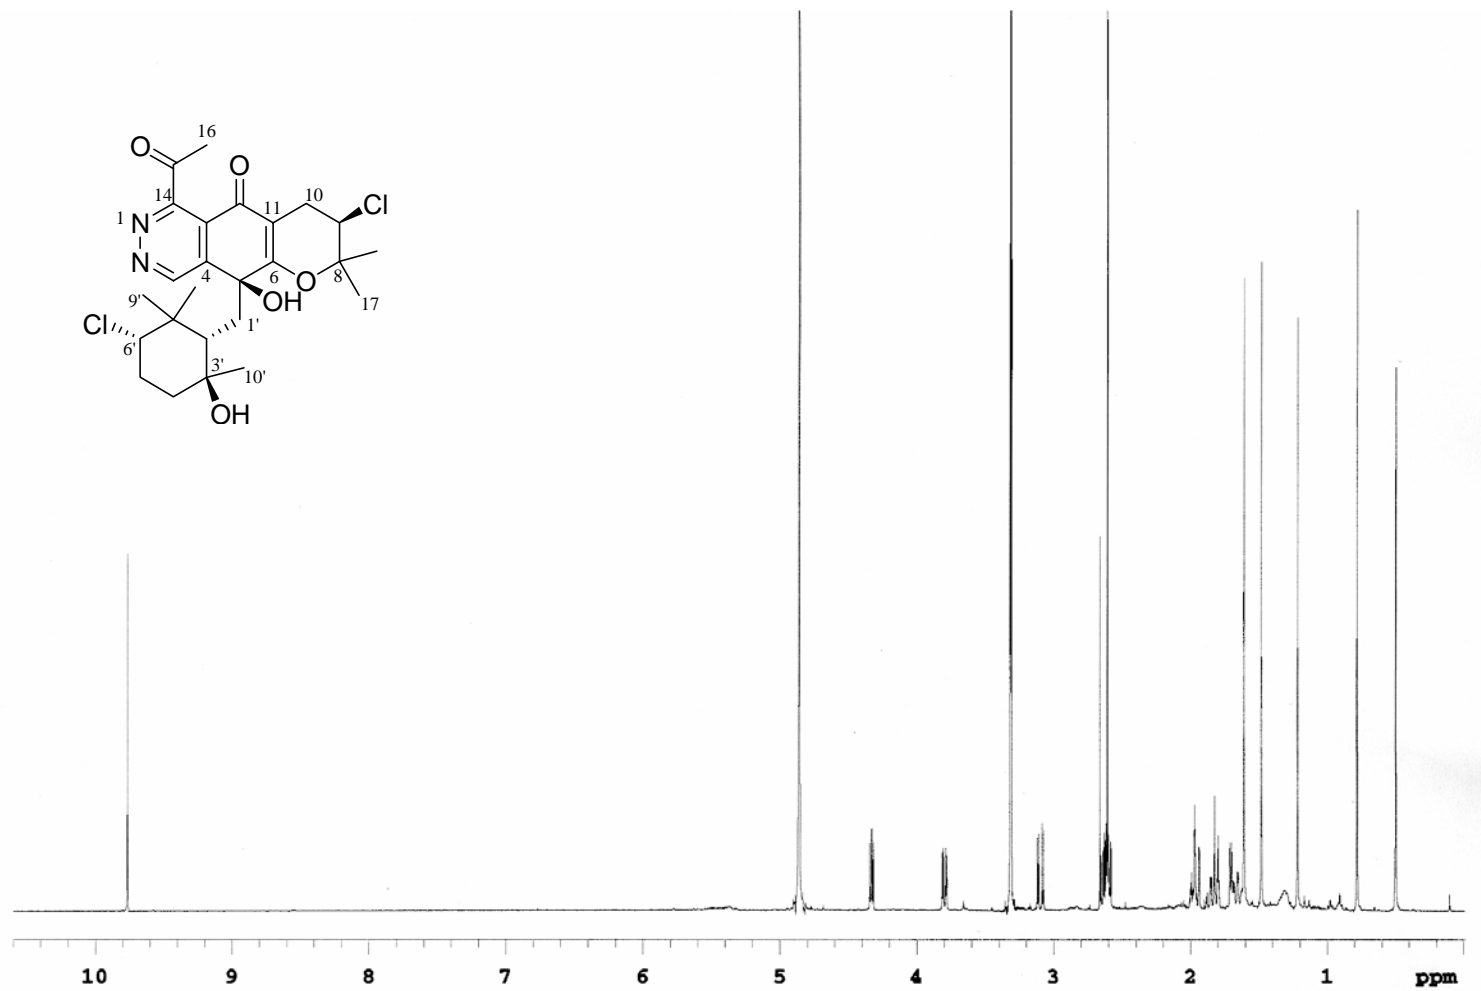

Figure S2.  $^{13}\text{C}$  NMR Spectrum (125 MHz) of Azamerone (**1**) in  $\text{CD}_3\text{OD}$

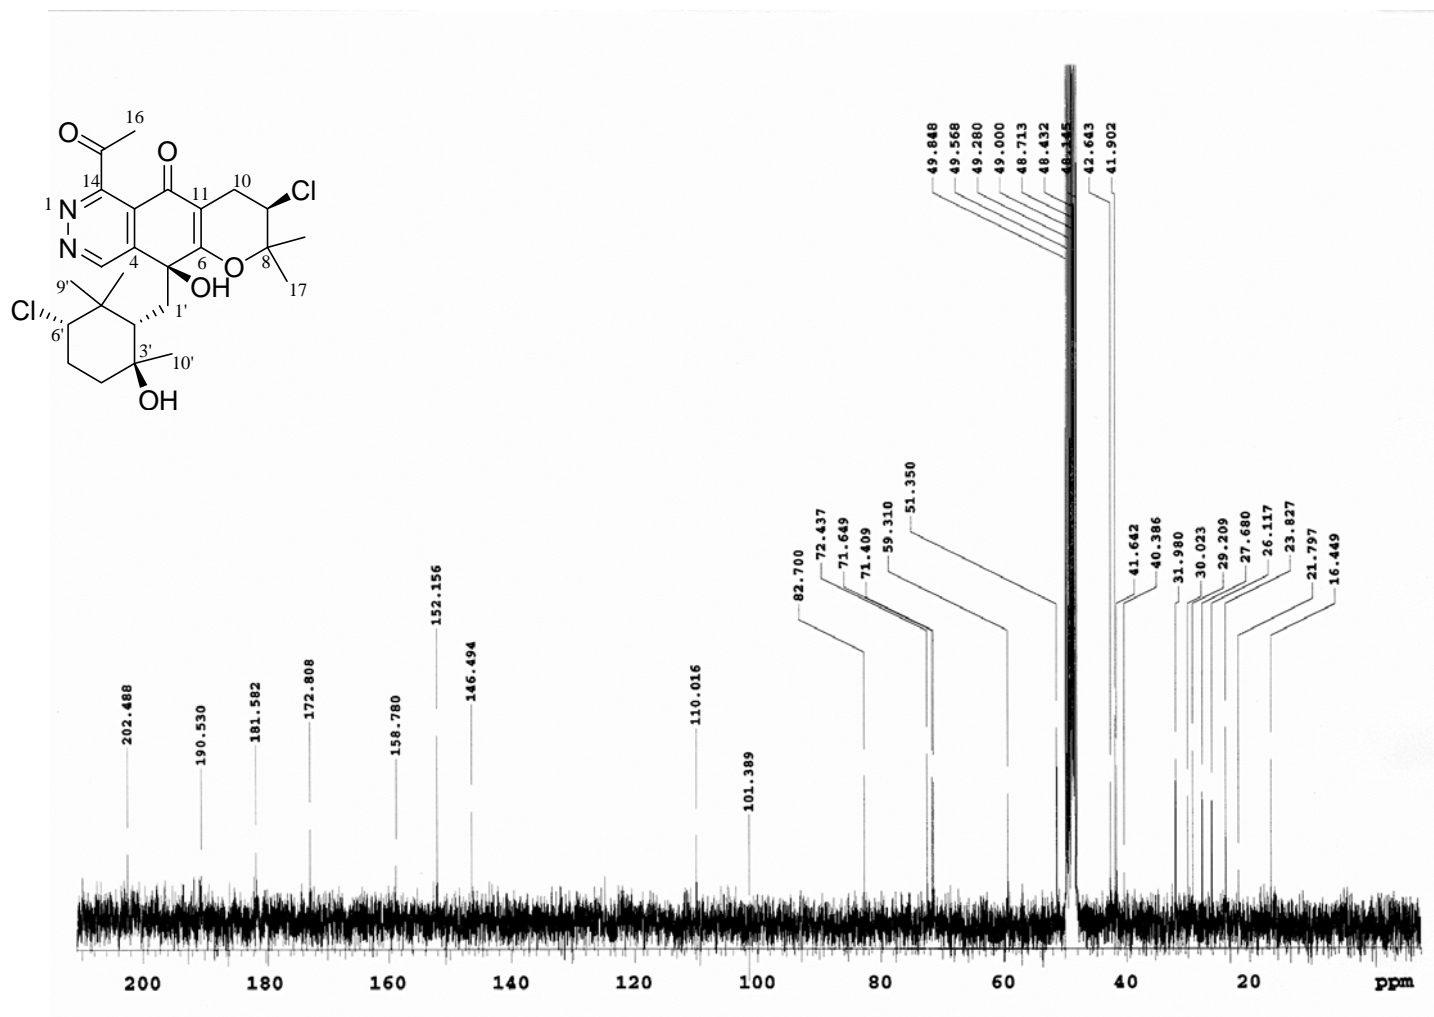

**Figure S3.** gHMQC NMR Spectrum (500 MHz) of Azamerone (**1**) in CD<sub>3</sub>OD

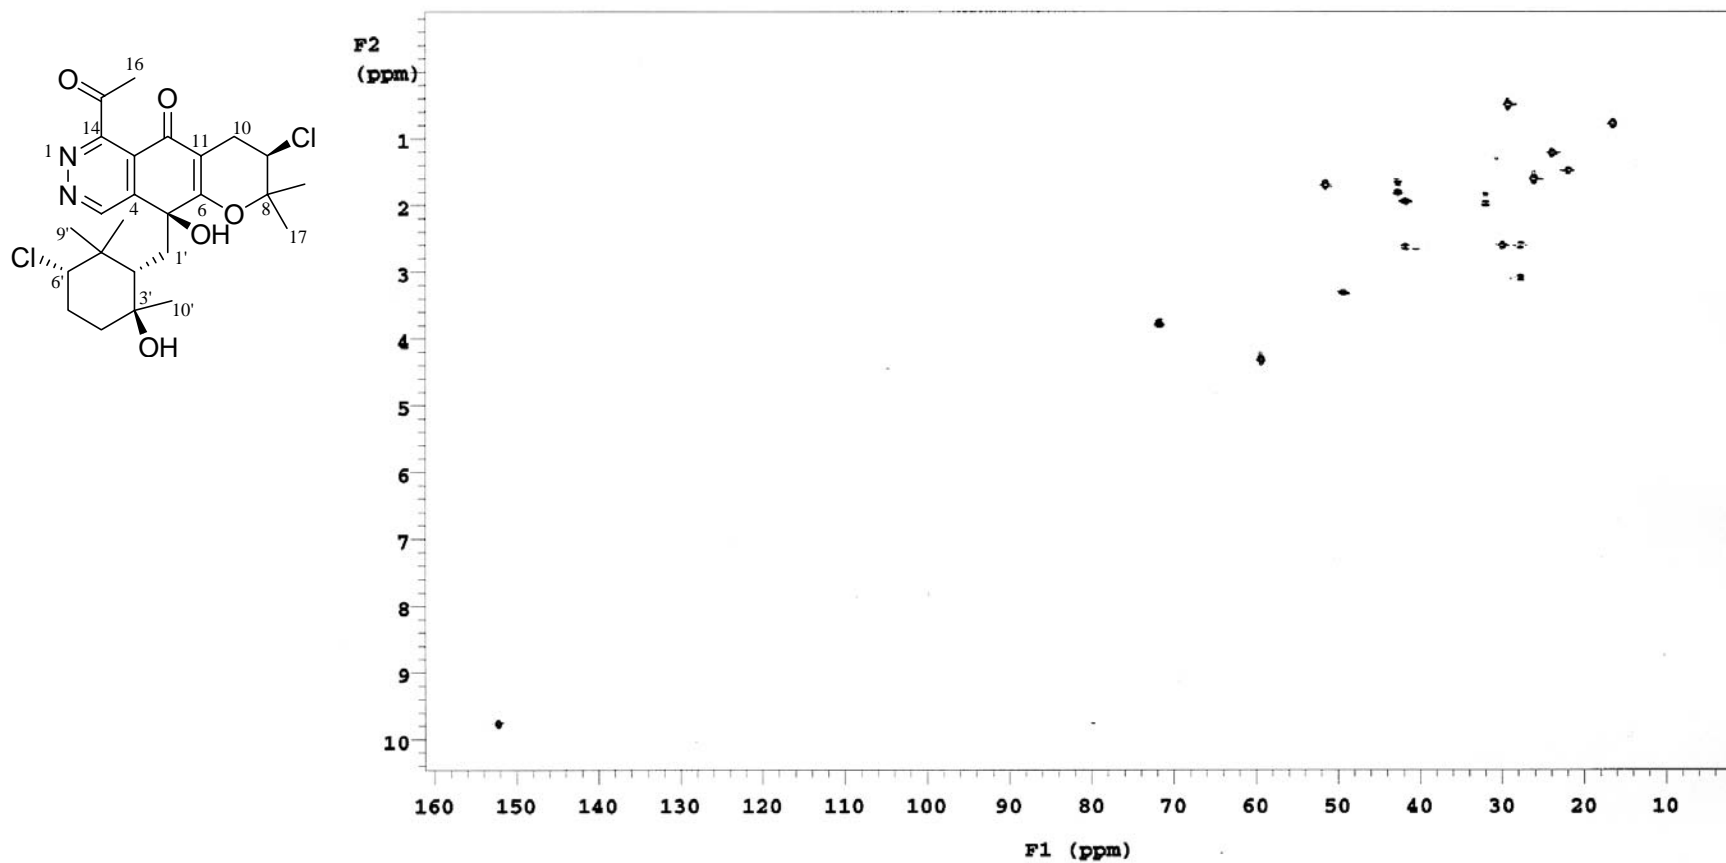

**Figure S4.** gCOSY NMR Spectrum (500 MHz) of Azamerone (**1**) in CD<sub>3</sub>OD

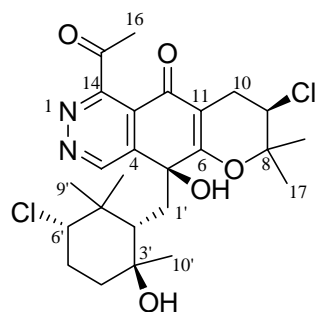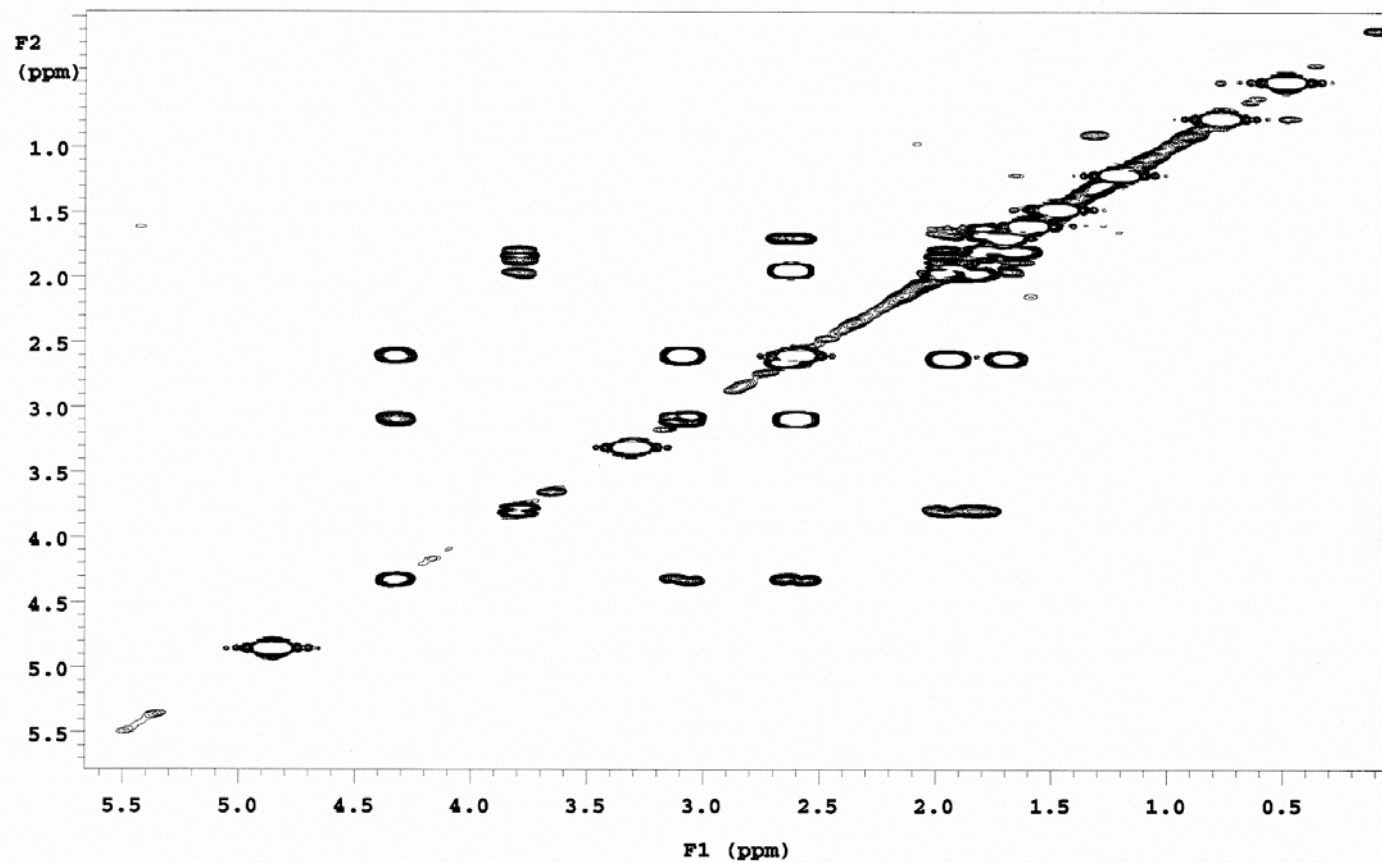

**Figure S5.** gHMBC NMR Spectrum (500 MHz) of Azamerone (**1**) in CD<sub>3</sub>OD

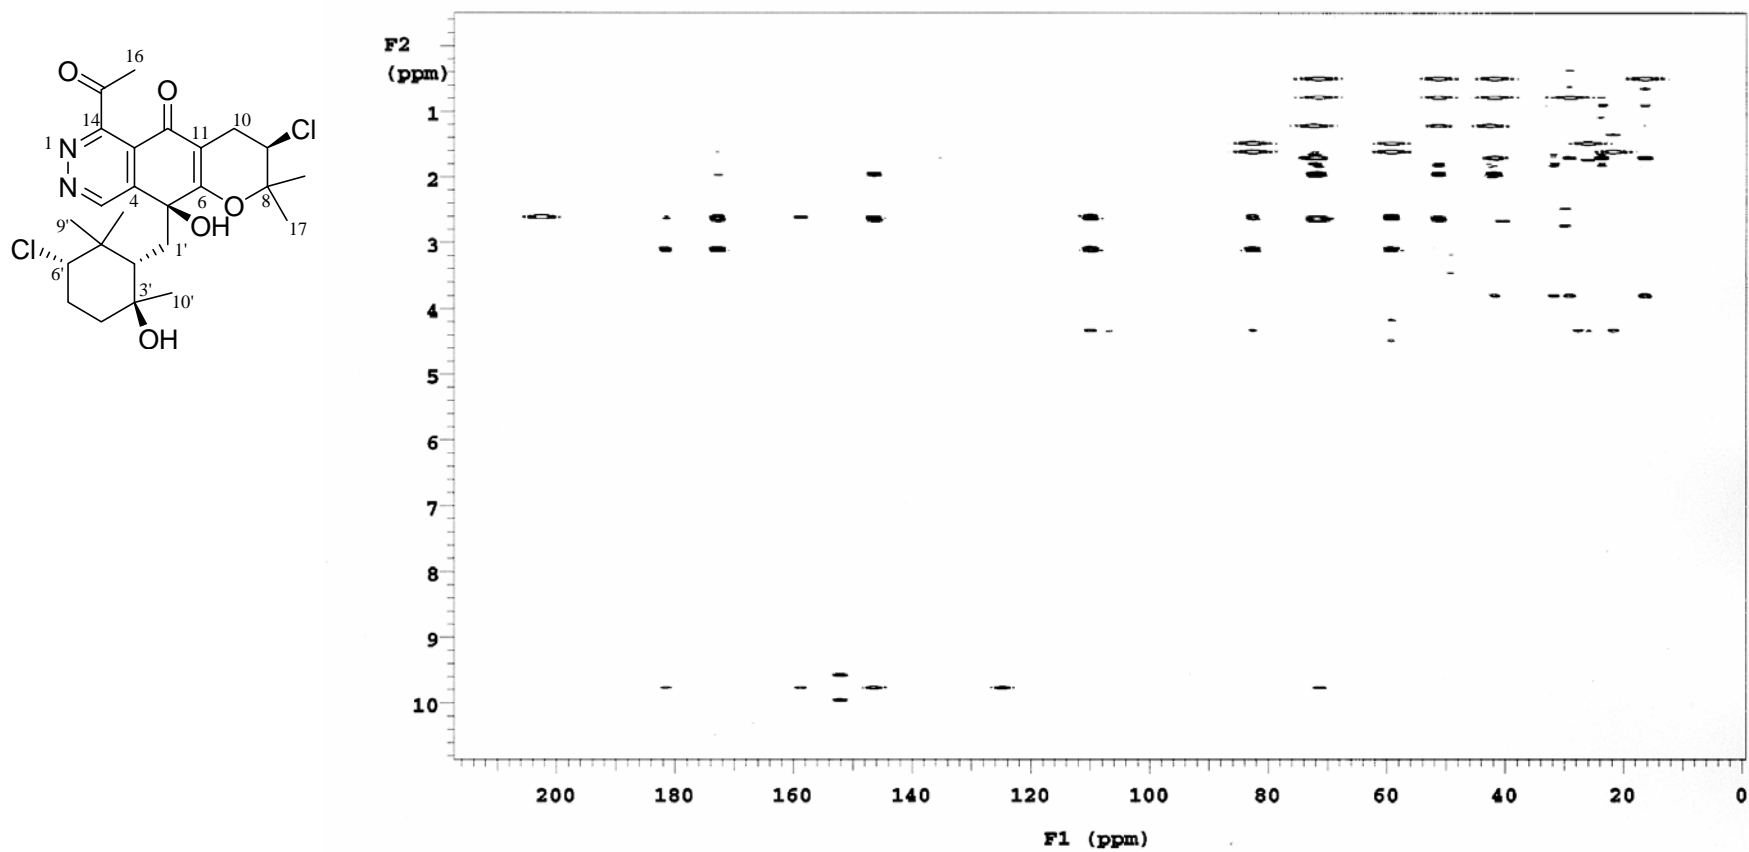



**Figure S6.** Expansion of gHMBC NMR Spectrum (500 MHz) of Azamerone (**1**) in CD<sub>3</sub>OD

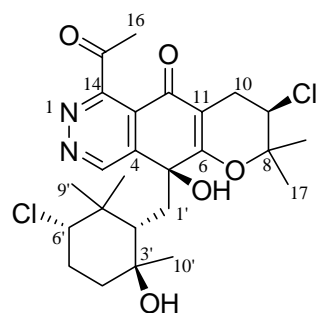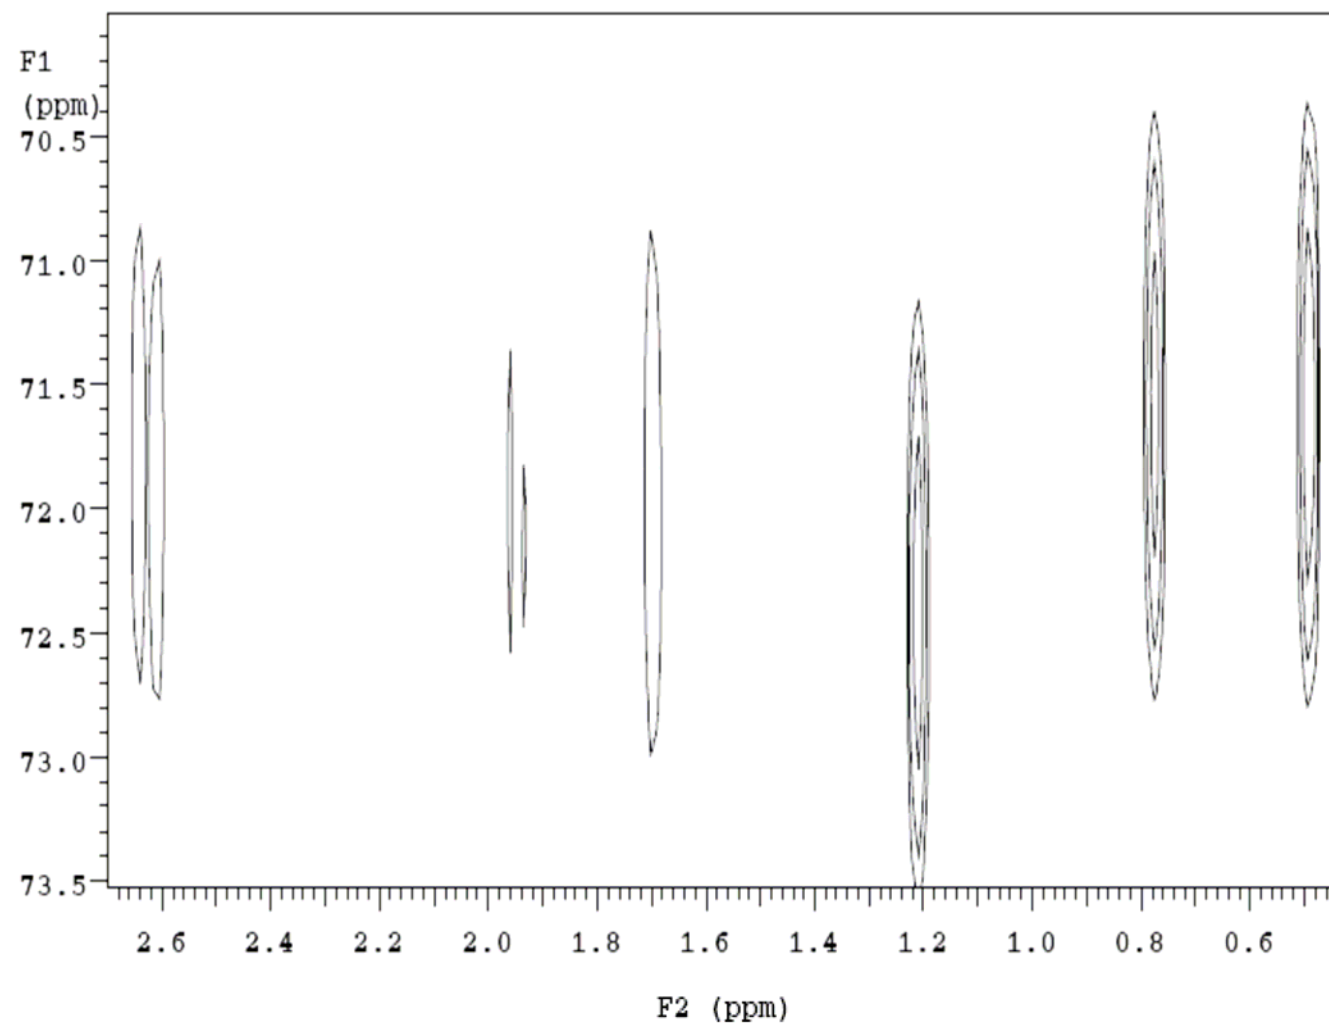

**Figure S7.** Expansion of gHMBC NMR Spectrum (500 MHz) of Azamerone (**1**) in CD<sub>3</sub>OD

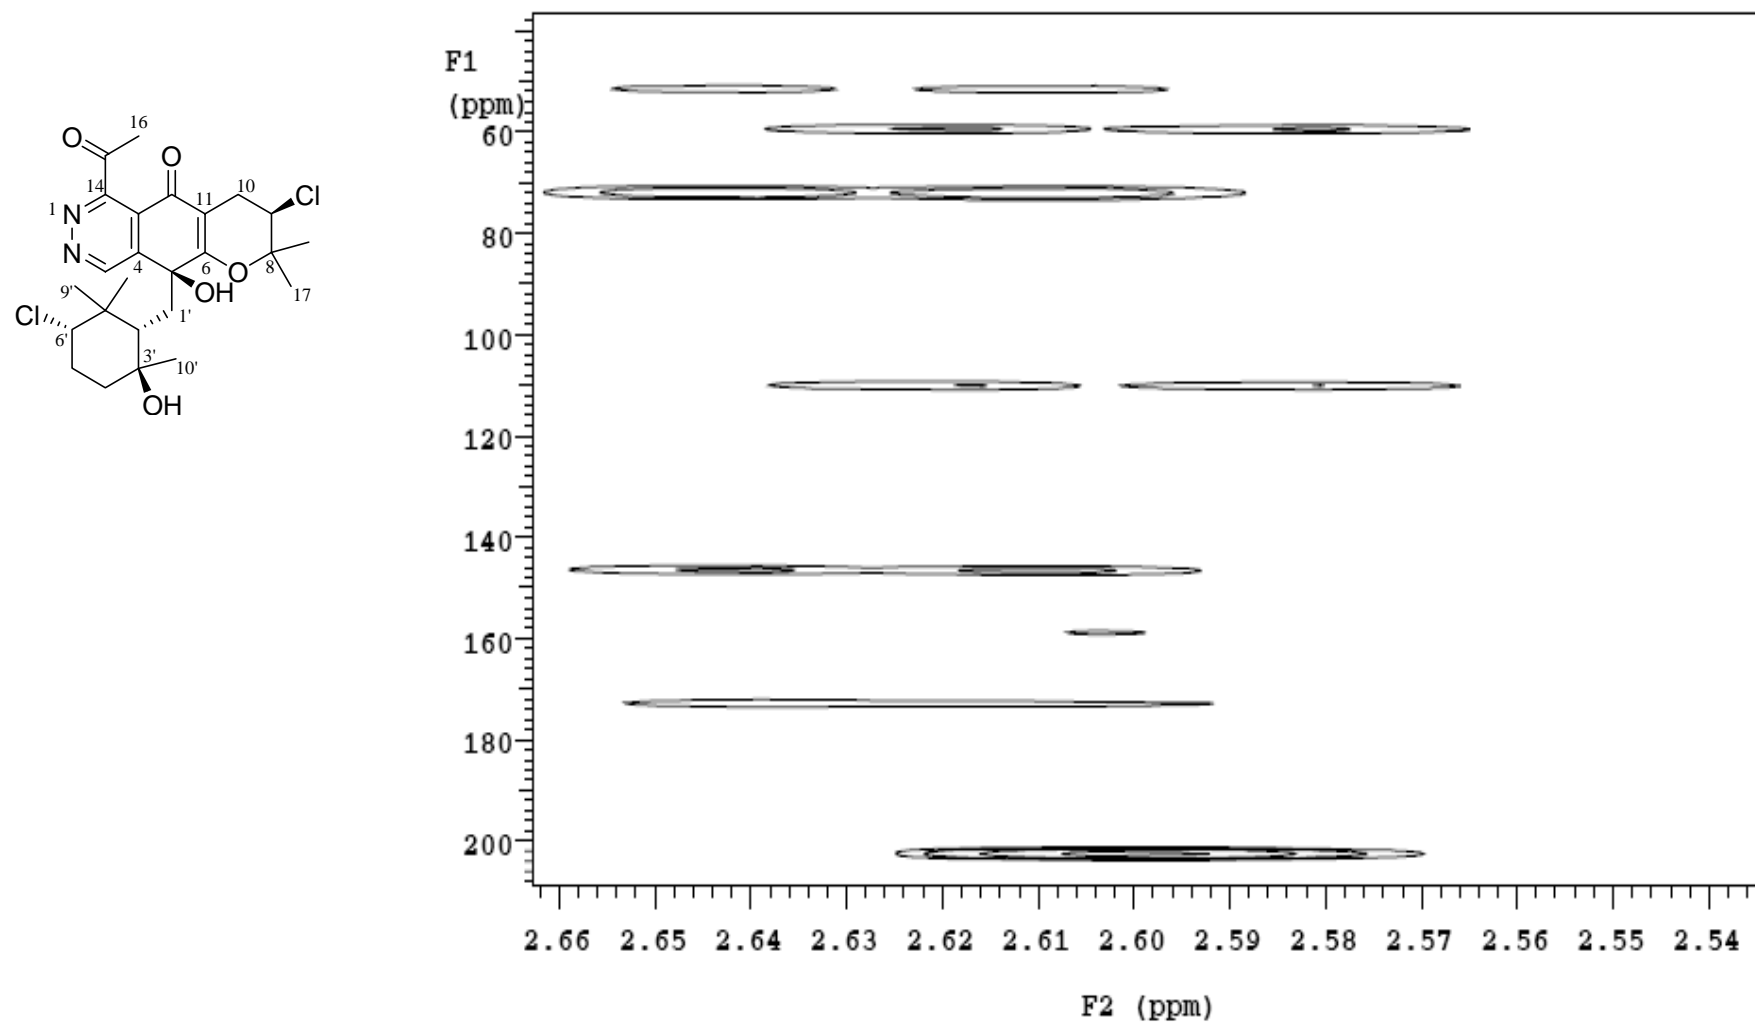

**Figure S8.** Crystal structure

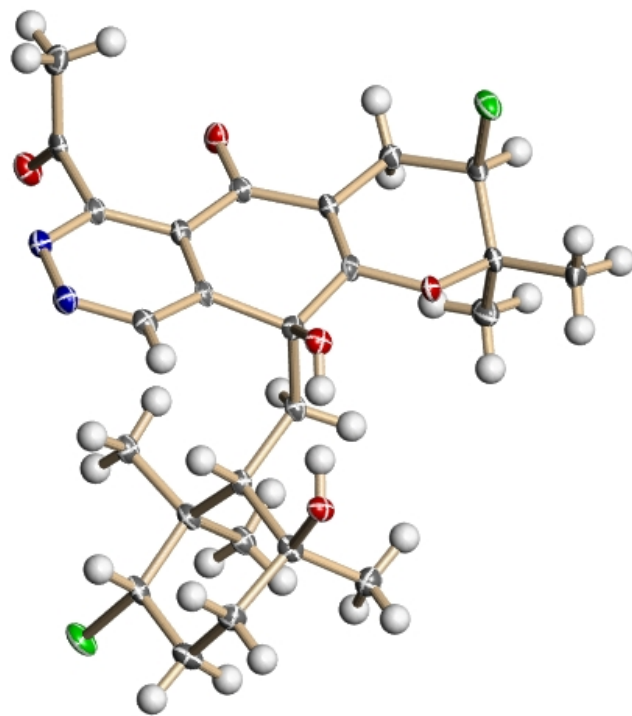

**Figure S9.** UV spectra of Azamerone (**1**) in CH<sub>3</sub>OH

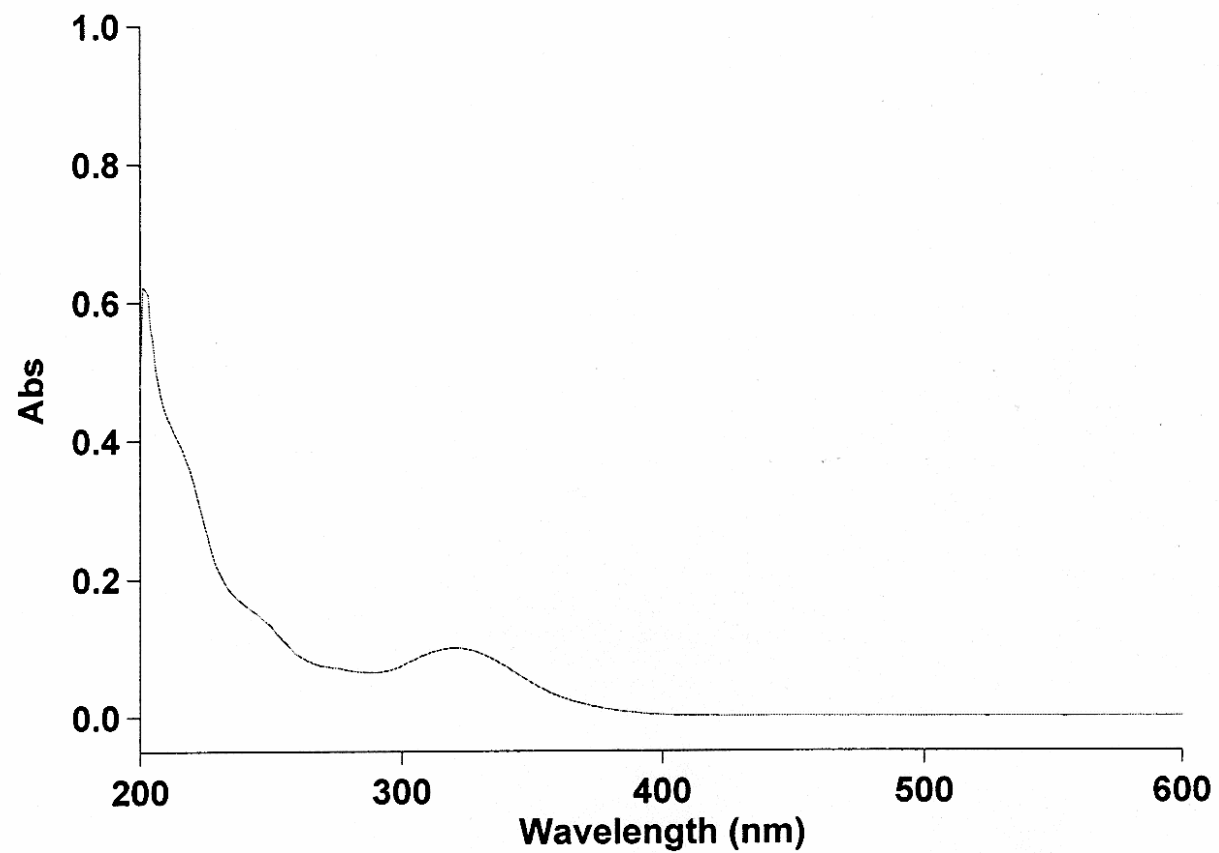

**Figure S10.** HR-ESI-TOFMS of Azamerone (1) in CH<sub>3</sub>OH

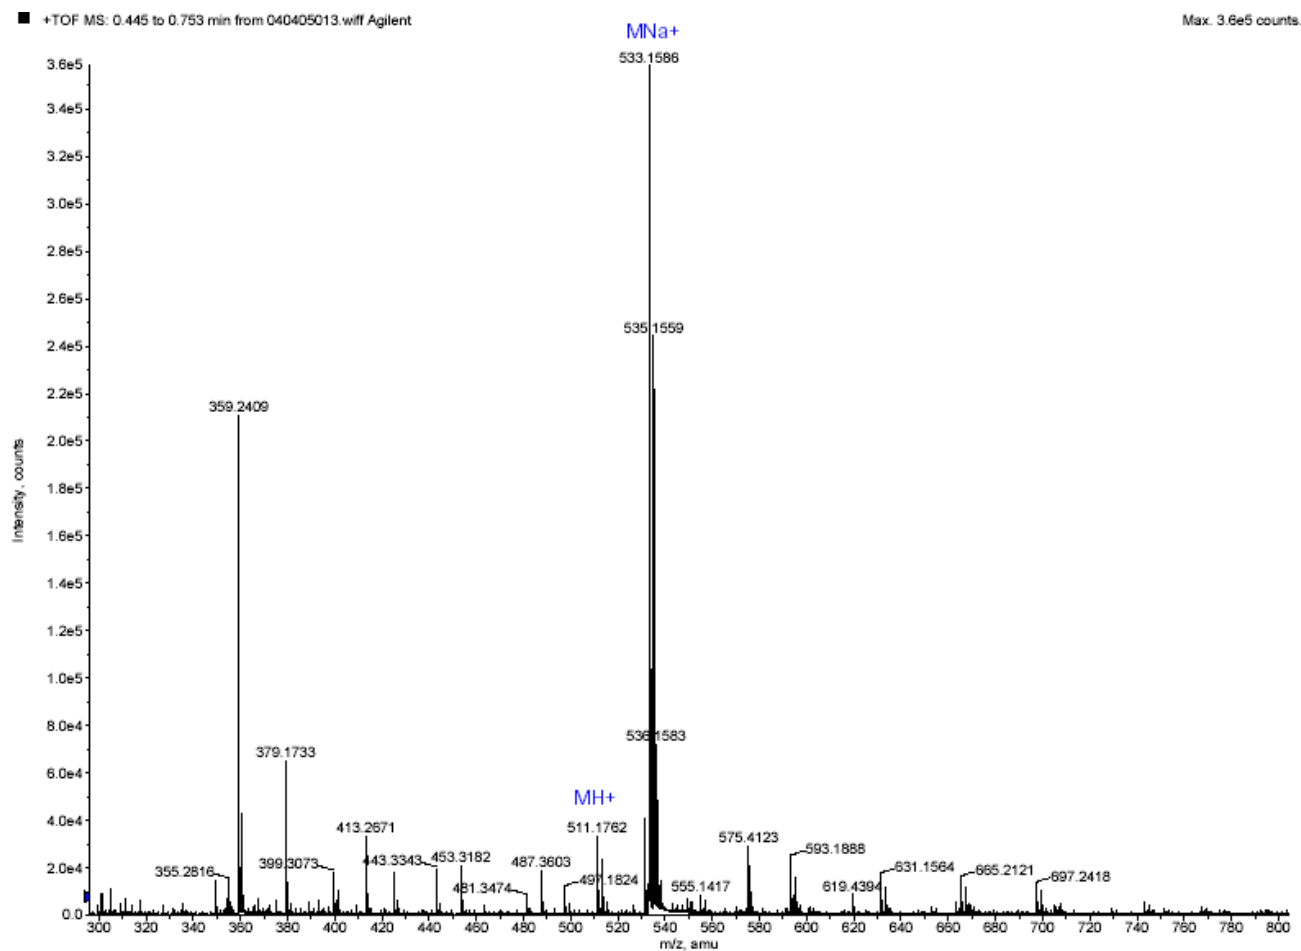

Supplement: NIHMS63794-supplement-2si20060427_09.pdf [file NIHMS63794-supplement-2si20060427_09.pdf]
